# Supplementary material for: Screening and Evaluation of New Hydroxymethylfurfural Oxidases for Furandicarboxylic Acid Production
Source: PubMed Central journal article supplement (PMC7414962; doi:10.1128/aem.00842-20), 2020-08-03
Supplement: AEM.00842-20-s0001.pdf [file AEM.00842-20-s0001.pdf]

## SUPPLEMENTAL MATERIAL

### Screening and Evaluation of New Hydroxymethylfurfural Oxidases for Furandicarboxylic Acid Production

Mario Viñambres,<sup>†</sup> Marta Espada,<sup>†</sup> Angel T. Martínez,<sup>#</sup> Ana Serrano<sup>#</sup>

<sup>†</sup>Centro de Investigaciones Biológicas Margarita Salas, CSIC, Ramiro de Maeztu 9, E-28040 Madrid, Spain

<sup>#</sup>Corresponding authors: [anaserra@cib.csic.es](mailto:anaserra@cib.csic.es) and [ATMartinez@cib.csic.es](mailto:ATMartinez@cib.csic.es)

<sup>†</sup>Mario Viñambres and Marta Espada contributed equally to this study and the authors order corresponds to their successive contribution to the work

Supplemental material includes: Inventory of HMFO sequences from GenBank (**Table S1**), Nucleotide sequences of five *hmfo* genes (**Table S2**), Conditions for purification of the different HMFOs (**Table S3**), Secondary structure elements of the different HMFOs (**Table S4**), Sequence alignment of HMFOs (**Fig. S1**), SDS-PAGE along the purification of HMFOs (**Fig. S2**), Spectroscopic properties of HMFOs (**Fig. S3**), Residual activities during HMF oxidation under different conditions (**Fig. S4**), Changes in spectroscopy properties of vanillyl alcohol and vanillin with pH (**Fig. S5**).

**Table S1.** Information on the protein sequences obtained (identity >45%) after BLASTing *MetspHMFO* against the GenBank database, with the five enzymes optimized for *E. coli* production in bold.

| ID number           | Species                                 | Score      | E-value       | Identity (%) | Length (aa) | MW <sub>theoretical</sub> | pI <sub>theoretical</sub> |
|---------------------|-----------------------------------------|------------|---------------|--------------|-------------|---------------------------|---------------------------|
| <b>WP_013440946</b> | <b><i>Methylovorus</i> sp. MP688</b>    | --         | --            | --           | <b>531</b>  | <b>57014.41</b>           | <b>5.87</b>               |
| WP_015829137        | <i>Methylovorus glucosotrophus</i>      | 1054       | 0.0           | 99.06        | 531         | 56965.34                  | 5.92                      |
| WP_024929608        | <i>Methylophilus</i> sp. OH31           | 749        | 0.0           | 70.32        | 531         | 57441.61                  | 5.02                      |
| WP_019881601        | <i>Methylophilus</i>                    | 751        | 0.0           | 70.13        | 531         | 57517.62                  | 4.91                      |
| WP_047514482        | <i>Methylophilus</i> sp. Q8             | 750        | 0.0           | 70.13        | 531         | 57516.68                  | 4.98                      |
| WP_131182903        | <i>Pseudomonas</i> sp.                  | 641        | 0.0           | 63.57        | 528         | 57373.83                  | 5.85                      |
| WP_122949865        | <i>Burkholderia lata</i>                | 630        | 0.0           | 63.53        | 533         | 56690.08                  | 6.37                      |
| WP_054910186        | <i>Pseudomonas</i>                      | 647        | 0.0           | 63.52        | 531         | 57081.33                  | 5.81                      |
| <b>WP_024766380</b> | <b><i>Pseudomonas nitroreducens</i></b> | <b>647</b> | <b>0.0</b>    | <b>63.52</b> | <b>531</b>  | <b>57084.20</b>           | <b>5.65</b>               |
| WP_084358398        | <i>Pseudomonas nitroreducens</i>        | 646        | 0.0           | 63.52        | 531         | 57154.34                  | 5.72                      |
| WP_065086293        | <i>Pseudomonas</i> sp. AU12215          | 644        | 0.0           | 63.52        | 531         | 57128.26                  | 5.65                      |
| WP_131187983        | <i>Pseudomonadaeae bacterium</i> P30C   | 638        | 0.0           | 63.38        | 528         | 57312.70                  | 5.73                      |
| <b>WP_047529632</b> | <b><i>Pseudomonas</i> sp. 11/12</b>     | <b>660</b> | <b>0.0</b>    | <b>62.85</b> | <b>530</b>  | <b>57130.38</b>           | <b>5.68</b>               |
| WP_090462207        | <i>Pseudomonas mohnii</i>               | 659        | 0.0           | 62.66        | 530         | 57107.41                  | 5.68                      |
| WP_105697938        | <i>Pseudomonas poae</i>                 | 659        | 0.0           | 62.48        | 530         | 57189.27                  | 6.09                      |
| WP_048372898        | <i>Pseudomonas helleri</i>              | 624        | 0.0           | 61.54        | 530         | 57271.30                  | 5.53                      |
| WP_110950867        | <i>Pseudomonas bohemica</i>             | 622        | 0.0           | 60.98        | 530         | 57137.32                  | 5.69                      |
| OYU07719            | <i>Pseudomonas</i> sp. PGPPP1           | 638        | 0.0           | 60.23        | 530         | 57209.04                  | 5.97                      |
| <b>WP_092217059</b> | <b><i>Bradyrhizobium arachidis</i></b>  | <b>429</b> | <b>2e-141</b> | <b>47.00</b> | <b>565</b>  | <b>61033.90</b>           | <b>9.12</b>               |
| WP_012331246        | <i>Methylobacterium</i> sp. 4-46        | 426        | 3e-140        | 46.82        | 570         | 60407.96                  | 9.41                      |
| <b>WP_029556649</b> | <b><i>Xanthobacter</i> sp. 91</b>       | <b>432</b> | <b>1e-142</b> | <b>46.81</b> | <b>562</b>  | <b>59717.16</b>           | <b>7.69</b>               |
| WP_018262292        | <i>Methylobacterium</i> sp. WSM2598     | 424        | 1e-139        | 46.64        | 570         | 60393.93                  | 9.41                      |
| WP_029002663        | <i>Azorhizobium doebereineriae</i>      | 452        | 1e-150        | 46.63        | 568         | 59855.51                  | 8.86                      |

|              |                                     |     |        |       |     |          |      |
|--------------|-------------------------------------|-----|--------|-------|-----|----------|------|
| WP_131320784 | <i>Burkholderia</i> sp. WK1.1f      | 447 | 1e-148 | 46.58 | 582 | 62871.00 | 8.92 |
| WP_128925190 | <i>Bradyrhizobium guangxiense</i>   | 434 | 2e-143 | 46.52 | 565 | 61195.13 | 8.51 |
| WP_024277017 | <i>Xanthobacter</i> sp. 126         | 427 | 9e-141 | 46.45 | 565 | 60117.48 | 6.48 |
| WP_063984192 | <i>Bradyrhizobium</i> sp.           | 421 | 2e-138 | 46.41 | 565 | 60808.66 | 8.75 |
| WP_128965697 | <i>Bradyrhizobium guangdongense</i> | 440 | 9e-146 | 46.34 | 565 | 61229.21 | 9.28 |
| WP_057744137 | <i>Bradyrhizobium manausense</i>    | 423 | 4e-139 | 46.34 | 565 | 61423.24 | 8.90 |
| WP_132475546 | <i>Paracandidimonas soli</i>        | 457 | 2e-152 | 46.15 | 566 | 62476.45 | 8.78 |
| WP_038934019 | <i>Bradyrhizobium japonicum</i>     | 430 | 6e-142 | 46.06 | 565 | 61068.90 | 8.92 |
| WP_060849362 | <i>Methylobacterium aquaticum</i>   | 405 | 6e-132 | 46.05 | 571 | 60849.36 | 8.23 |
| WP_048436760 | <i>Methylobacterium platani</i>     | 404 | 1e-131 | 46.05 | 571 | 60903.45 | 8.23 |
| WP_039150218 | <i>Bradyrhizobium japonicum</i>     | 426 | 2e-140 | 45.88 | 565 | 61129.05 | 9.18 |
| WP_028149427 | <i>Bradyrhizobium japonicum</i>     | 424 | 9e-140 | 45.88 | 565 | 61004.82 | 9.08 |
| WP_071915236 | <i>Bradyrhizobium japonicum</i>     | 417 | 6e-137 | 45.88 | 565 | 60782.50 | 8.24 |
| WP_048427955 | <i>Methylobacterium platani</i>     | 403 | 3e-131 | 45.87 | 571 | 60889.43 | 8.23 |
| WP_020066156 | <i>Paraburkholderia caledonica</i>  | 442 | 2e-146 | 45.86 | 582 | 62868.92 | 8.81 |
| WP_015931284 | <i>Methylobacterium nodulans</i>    | 403 | 3e-131 | 45.80 | 573 | 60854.53 | 8.98 |
| WP_086651868 | <i>Acetobacter cibinogensis</i>     | 410 | 1e-134 | 45.79 | 540 | 57775.10 | 5.58 |
| SFF24619     | <i>Methylobacterium</i> sp. yr596   | 402 | 5e-131 | 45.69 | 573 | 61194.84 | 8.55 |
| WP_091887066 | <i>Methylobacterium</i> sp.         | 402 | 5e-131 | 45.69 | 571 | 60907.46 | 8.23 |

**Table S2.** Nucleotide sequences of the five *hmfo* genes optimized for *E. coli* expression (FASTA format).

---

>METSF\_WP013440946  
CATATGACTGATACGATTTTTGACTACGTGATTGTTGGCGGTGGCACGGCGGGTAGCGTTCTGGCCAA  
CCGTCTGTCCGCCCGTCCGGAGAATCGCGTGTGCTGATTGAGGCCGGTATTGATACCCCGGAAAACA  
ATATTCGCCCGGAGATCCACGATGGCCTGCGCCCGTGGCTGCCGCGTCTGAGCGGTGATAAGTTCTTT  
TGGCCGAATCTGACCATCCACCGTGCCGCGGAACACCCGGGTATCACGCGGAGCCGCAGTTCTATGA  
ACAAGGCCGTCTGCTGGGCGGTGGTAGCAGCGTGAACATGGTCGTTTCTAACCGTGGTCTGCCTCGCG  
ACTATGACGAATGGCAGGCACTGGGCGCAGATGGTGGGATTGGCAGGGTGTCTGCCGTACTTCATC  
AAGACCGAGCGTGACGCGGACTACGGTGACGACCCGTTGCATGGCAATGCGGGTCCGATTCCGATCGG  
TCGCGTCGATTTCGCGTCACTGGAGCGACTTCACGGTGGCGGCAACCCAAGCTCTGGAAGCGGCTGGCC  
TGCCGAACATTCACGACCAAAACGCACGTTTTGATGACGGTACTTCCCACCGGCATTTACGTTGAAA  
GGTGAAGAGCGCTTCAGCGCCGCACGCGGTTATCTGGATGCGAGCGTCCGTGTGCGTCCGAACCTGAG  
CCTGTGGACTGAGAGCCGTGTCTGAAGCTGCTGACCACTGGCAATGCAATCACCGGTGTGAGCGTGC  
TGCGTGGTTCGCGAAAACCTGCAAGTTCAAGCGCGGAGGTATCCTGACCGCCGGTGCCTTCAAAGC  
CCAGCGATTCTGTTGCGCACCGGCATCGGCCCTGCGGCGGATCTGCACGCACTGGGTATTCCTGTTCT  
GGCAGACCGTCCGGGTGTTGGTTCGCAATCTGTGGGAGCACAGCTCTATCGGTGTGGTTGCCCGCTGA  
CCGAGCAGGCACGTGCAGACGCCAGCACGGGTAAAGCCGGCTCTCGCCATCAACTGGGTATCCGTGCG  
TCGTCCGGCGTAGATCCGGCGACGCCTAGCGACCTGTTTCTGCATATCGGTGCTGATCCAGTCAGCGG  
TCTGGCAAGCGCTGTGTTCTGGGTGAACAAGCCAAGCTCCACCGGCTGGCTGAAGCTGAAGGACGCGG  
ACCCGTTTAGCTACCCGGACGTAGACTTCAATCTGCTGAGCGATCCGCGGACTTGGGTCTCTGAAA  
GCGGGCCTGCGTCTGATCACCCATTACTTCGCAGCGCCGTCCTGGCGAAAATATGGTTTGGCGCTGGC  
ATTGAGCCGTTTTGCGGCACCGCAGCCGGGTGGTCCGCTGCTGAACGACCTGTTGCAGGACGAAGCCG  
CCCTGGAACGCTATTTGCGTACGAACGTGCGCGGTGTTTGGCATGCGAGCGGCACGGCGCGTATCGGC  
CGTGCGGATGATTCCAGGCTGTTGTGATAAAGCGGGTTCGTGTGTACGGCGTCACCGGCTGCGTGT  
TGCGGACGCAAGCATTATGCCGACCGTTCCGACCGCCAATAACCAATCTGCCGACGCTGATGCTGGCTG  
AGAAAATTGCGGATGCGATTCTGACCCAGGCTTAAGGATCC

>PSESP\_WP047529632  
ATATGAGCATTGAACATTATGATTATATTATTGTGGGCGGCGGCAGCGCGGGCAGCGTGATTGCGAAC  
CGCCTGAGCGCGCGCGCGGATCGCCGCGTGTGCTGATTGAAGCGGGCGCGGATACCCCGGATAGCAA  
CACCCCGGCGGAAATCTGGATGGCCTGCAGCCGTGGCGCCCGCGCCTGGCGGGCGAACGCTATTTTT  
GGCCGATCTGACCATTCTGCGCGGAGCGAACATCCGGATATTCCGCGCGATGCGCAGGTGTATGAA  
CAGGGCCGCATTCTGGGCGGCGGCAGCAGCGTGAACATGATGGTGGCGAACCGCGGCCTGCCGCGCGA  
TTATGATGAATGGGCGCAGCAGGGCGCGGATGGCTGGAACCTGGCAGGGCGTGTGCCGTATTTTCGCA  
AACTGGAACGCGATCTGGATTTTGGCCAGAGCGATCCGGAACAGCATGGCCATGAAGGCCGCTGCCG  
ATTGCGCGCGTGGATAGCCGCTATTTGGGCGAGCTTTACCCGCGGAGCGCGCAGGCGCTGCAGGCGCT  
GGGCTGAACAACATTTGTGGATCAGAACGGCCGCTTTGAAGATGGCTATTTTGCGCCGACCGTGGCGA  
TTGAACATGATCAGCGCGTGAGCAGCGCGCGCGTATCTGACCCGCGAGGTGCGCGCGCGCAGCAAC  
CTGACCCTGTGGACCGATACCCCGGTGCGCCAGCTGATTCTGAGCGGCAACCGCGTGACCGGCGTGCA  
GGTGTGCGCGATGGCAAACGCCTGGAAGTGAGCGGCAACGAAGTGATTCTGACCGCGGGCGCGCTGC  
AGAGCCCGCGTTTTCTGCTGCGCGGGCATTGGCCCGGCGGATCAGCTGCGCGATCTGGGCATTGCG  
GTGGTGGCGGATCGCAGCGGCGTGGGCGCAACCTGTGGGATCATAGCAGCATTGGCCTGACCGCGAC  
CCTGCATGATCCGCTGGCGCCGAGCGATGAACCGGGCGCGGCGCATCTGCTGGCGGCGCGCGTGAGCA  
GCGGCGTGGCGCCGGCGTGC CGGCGGATCTGTATCTGGGCATTGCGCCGAACGCGGCGCTGGGCACC  
GCGAGCGCGGTGCTGTGGGTGAACAAACCGAGCAGCACCGGCCATCTGCGCCTGCGCAGCGTGGACCC  
GATGGATTATCCGGCGGTGGAATTTAACCTGCTGAGCGATCGCCGCGATCTGGATCGCCTGCGCGAAG  
GCCTGCGCGTGTGCGCGCGCTGTTTGCGGACCCGGCGGTGGCGGCGTTTAGCGGCCCGCCGCGCCTG  
AGCCGCTTTGCGCAGGCGAGCACCGATGGCCCGCTGCTGAGCGAACTGCTGGCGAACGATGTGGCGCT  
GGAACGCTATCTGCGCACCCATGTGGGCGGCGTGTGGCATGCGAGCGGCACCTGCCGATTTGGCCGCC  
CGGATGATCCGCTGGCGGTGGTGGATCATGCGGGCAAAGTGATGGCGTGCAGGGCCTGCGCGTGGCG  
GATGCGAGCGTGATGCCGAGCATTCGGCGGCGAACACCAACCTGCCGACCCTGATGATTGCGGAAAA  
AATTGCGGATGCGATTCTGACCGATGCGTAAGGATCC

>PSENI\_WP024766380

CATATGACCACCCCGCCTTACGACCACATCATCGTTGGTGGTGGTTCTGCGGGTCTGTTCTGGCGTC  
TCGTCTGTCTGCGGACCCGACGCTCACGTTCTGCTGATCGAAGCGGGTCCGGACACCCCGCCGACG  
CGACCCCGGCGGAAATCCTGGACGGTCACAACCCGTTCCGCTGCGTTGGAACCTGCGTGACCGTTACT  
TCTGGCCGGACCTGTCTGTTTCGTCACGGTGCAGCCGGAAGGTATCGAACGTCGGAACGTTACCTG  
GAACAGGCGCGTGTCTGGGTGGTGGTTCTTCTGTAAACGTTCTGGTTGCGAACCGTGGTCTGCCGCG  
TGACTACGACCAGTGGGCGGCGCTGGGTGCGGAAGGTTGGGGTGGGACGACGTTCTGCCGTACTTCC  
GTAAACTGGAACGTGACACCGACTACGCGGGTCCGCTGCACGGTACGACGGTCCGATCCCGATCTCT  
CGTGTCTTCTACCCGTGACTGGACCCGTTACCCGTTCTGTTGTTTCTGCGCTGCAGGCGGAAGGTCT  
GCGTGACATCGGTGACCAGAACGGTGTTCGACGACGGTTACTTCGCGCCGCGGGTTAACCTGGAAC  
ACGGTCAGCGTGTTCGCGGCGCGTGGTTACCTGGACGAAGCGGTTCTGCGCGTCCGAACCTGACC  
CTGTGGACCGACTCTCAGGTTCTGGGTCTGCAGCGTGAAGGTACCCGATACCCGGTGTGAACTGCA  
GCGTAACGGTGAACACGTTACCGTTGGTGCGGGTGAAGTTATCCTGGCGGCGGGTGCCTGCAGTCTC  
CGGCGTTCCTGCTGCGTCTGGTATCGGTCCGGCGTCTCAGCTGCAGGAACGGGTATCGAAGTTATC  
GCGGACCGTCCGGGTGTTGGTGGTAACCTGTGGGAACACTCTTCTCTGGGTACCCTGGCGACCCTGGG  
TGACGCGGCGCGTCTGACGCGGTTCTGGCGCGTCCGGGTACCTCTCACCAGCTGGGTATCCGTGTTT  
CTTCTGGTGTGACCCGGACACCCGCTGACCTGTACCTGGCGATCGGTGCGGACGCGGAACGTGGT  
GTTGCGCACGCGCTGTTCTGGATCAACAAACCGTCTTCTTCTGGTCTGACCTGCGTGACCGTGA  
CCCGGCGTCTCCGCCGACGTTGACTTCAACCTGCTGTCTGACCCGCGTGACCTGCAGCGTGCAGCGT  
TTGCGCTGCGTACCATCCAGCGTCTGTTCAAACACCCGGTTCTGGCGCGTTACGAACTGCAGCTGGCG  
CTGACCCCGTTCCGCGGTTCCGCAGCCGGGTGGTCCGAAACTGGAACCCCTGCTGGCGGACGACACCCG  
GCTGGAAGCGTACCTGCGTACGACATCGGTGGTGTTCGGCACCCGTTCTGGTACCTGCCGTATCGGTA  
CCGCGGACGACCCGACGGCGGTTGTTGACTCTGCGGGTCTGTTTACGGTGTGAAAGGTCTGCGTGT  
GCGGACGCGTCTATCATCCCGGTTATCCCGACCGGAACACCAACCTGCCGACCCTGATGCTGGCGGA  
AAAAATCGCGGACGCGATCCTGGGTGGTGCTAAGGATCC

> XANSP\_WP024277017

CATATGCGGACATGCCGTTCTTCGACACCGTTATCGTTGGTGGTGGTTCTGCGGGTTCGTTATGGC  
GAACCGTCTGTCTGCGGACCCGGCGCACTCTGTTCTGCTGATCGAAGCGGGTGAAGACACCCCGCCGG  
GTGCGGTTCCGGACGCGATCGCGGACTCTTACCCGATGGGTCTGTTCCACGGTGACCGTTTCGTTTGG  
CCGGGTCTGTCTGCGTTCACCGCGCACCGTCCGGACGGTACCCGTGGTTCTCGTGCGTACGAACAGGG  
TCGTGTTATGGGTGGTGGTTCTTCTATCAACGTTTCAAGTCTGCGAACCGTGGTCTGCCGCGTGACTACG  
ACGAATGGGCGGCGCTGGGTGCGGCGGGTTGGGGTGGGACGACGTTCTGCCGTTCTTTCATCAAACCTG  
GAACGTGACCTGGACTGCGACGGTCCGCTGCACGGTCTGACGGTCCGATCCCGATCCGTCGTATCCT  
GCCGCCGGGTGGCCCGCGTTCGCGGAAGCGGCGACCTCTGCGTTCGCGGCGTCTGGTCTGCCGCGTC  
GTCTGGACCAGAACGGTGAATTCGAAGACGGTGTTCGCGCCGGCGTTCAACAACGAAAACGACCGT  
CGTGTTCGCGGCGATCGGTTACCTGGACGCGGCGACCCGTCGCGTCCGAACCTGGCGATCTGGCC  
GCGTACCCAGGTTCTGCGTCTGCGTATGGACGGTGCAGCGTGCAGCGGGTGTTCAGGTTGAACGTGACG  
GTGTGTTACCGAAGTTGCGGCGGGTCTGTTGTTGTTACCGCGGGTGCCTGCAGACCCGGCGATC  
CTGATGCGTGCGGGTATCGGTGACGGTGTTCGCTGGCGGCGCTGGGTCTGCCGTTGTTATCCACCG  
TCCGGCGGTTGGTTCGTAACCTGCGTGACACCCGACCCCTGACCTTCTGCCAGTACCTGCCGGAACGTC  
TGCGTCTGCCGATGTCTTACCGTCTGCGTCTTTCGCGGCGCTGCGTTTCTTCTTCTGGTGTGACGGT  
GGTGAAGCGTCTGACCTGTACGCGACCGCGTCTGCGCGTGCAGGGTGGCACGGTCTGGGTCTGCGTCT  
GGGTCTGACTTCTTCTGTTGTTGCAACCGTCCGAAATCTTCTGGTCTGTTCTGTTCTGGTTCGCGGAC  
CGCGTGCGTACCCGACGGCGGACCTGAACCTGCTGGACGACCCGCTGACCTGGCGCGTATGAAAGCG  
GGTGTTCGTACCCTGTTCTCTCTGCTGGTTTTGCGAAGCGCTGAACCCGGACGCGGGTACGTTTTCC  
GGCGGCGTCTCTCCGTTTCGTTAAACGTTCTGCTCTGTTTACCCGTACCAACGCGCTGCTGGCGGAAG  
CGCTGGGTGCGCTGCTGGACGTTCCGGCGGCGCTGCGTACAGCCGCGCTGAAACGTTTTCATGTCTGGT  
GGTGTTCCTCTGGCGGAAATCGTTGCGGACGAAGCGCTCTGGAAGCGTTCGTTCTTCTACCTT  
CGGTGTTTGGCACGCGTCTGGTACCTGCCGCTGCGGTGCGCCGACGACCCGGAAGCGGTTCTGGACC  
CGTCTGGTCTGTTATCGGTTCTGAAAACCTGTACGTTGCGGACGCGTCTGCGATGCCGCGTCTGCCG  
TCTGCGAACCAACATCCCGGTTCTGATGATCGCGGAAAAATCGCGGCGGGTCTGGCGCGTGCTA  
AGGATCC

>BRAAR\_WP092217059

CATATGGATGGCCTGCATTTTGATGATGTGATTGTGGGCGGCGGCAGCGGGCTGCGTGCTGGCGAA  
CCGCCTGAGCGCGGATGCGCGCCGCATGTGCTGCTGATTGAAGCGGGCATGGATACCCCGCCGGAAG  
CGACCCGGCGGAAATTCTGGATAGCTATCCGATGCCGCTGTTTTTTGGCGATAAATATATTTGGCCG  
GGCCTGAGCGCGGCGGGCGGCGCAACGCGGAAGGCAAACCGGTGGTGC GCGCGTATGAACAGGGCCG  
CGTGATGGGCGGCGG CAGCAGCATTAACGTGCAGAGCGGAACCGCGGCCTGCCGCGCGATTATGATG  
AATGGCATGAACTGGGCGCGCGGGCTGGGGCTGGACCGATGTGCTGCCGTATTTTCTGAAACTGGAA  
ACCGATCTGGATTTTGGCGGCGCGCTGCATGGCCGCGGCGGCCCGATTCCGATTCGCCGCATTGCGCG  
CGAAGCGATGCCGGCGTTTTGGCCGCGCGGGCGGAAGCGCTGAGCGCGACCGGCCTGCCGTTTTCGCA  
AAGATCAGAACCGGAATTTGAAGATGGCATTTTTCCGCCGGCGTTTAGCAACCGCAACGATCGCCGC  
GTGAGCACCGCGGGGCTATCTGGATGCGGCGACCCGCGCGGCCCGAACCTGACCATTGGGCGGG  
CAGCGAAGTGGAACAGCTGCAGCTGGATGGCCGCCGCGCGCAGCGTGGTGGTGGCGCGGGCGGCC  
AGAAACTGACCGTGGGCGCGGGCCGCGTGATTCTGACCGCGGGCGCGCTGCAGAGCCCGCGATTCTG  
ATGCGCGCGGGCATTGGCCCCGGGCCGCTGCAGGCGCTGGGCATTCCGGTGGCGATTGATCTGCC  
GGGCGTGGGCGGCAACCTGCGCGATCATCCGGCGCTGACCTTTTGCCAGTATCTGCCGCGCCGCTGC  
GCCTGCCGCTGGCGCGCCGCCGCCGAACCTTACC GCGATGCGCTTTAGCAGCGGCCAGCCGGGCTGC  
GATCCGAGCGATATGTATATTACCGCGAGCGCGCGGGCGGCTGGCATGCGCTGGGCACCCGCCTGGG  
CCTGTATTTTCTGTGGTGAACCGCCCGTATAGCAGCGGCAGCCTGACCCTGGCGAGCCAGGACCCGA  
AAGCGTATCCGGTGGTGGATTTTAACCTGCTGAGCGATGAACGCGATGTGGAACGCCTGGTGAGCGCG  
GTGCGCCTGCTGGCGCGCCTGGTGGTGCATCCGCAGCTGAACCCGGAAGCGGGCGATTTTTTTCCGGC  
GAGCTATAGCCCGCGCATTAAACGCCTGAGCCGCTATGGCACCGCGAACCGCATTGTGGCGAGCATT  
TGGGCCCGATGCTGGATGTGCCGGCGGGCCTGCGCCAGCTGCTGATTCCGCTGGTGTGCTGAACGGC  
ACCGCGTTTTAGGCGACCCTGGCGGATGAACGCGCGCTGGAAGCGTTTTGTGCGCCAGAGCGTGTTTGG  
CGTGTGGCATCCGGTGGGCACCTGCCGCATGGGCGATCCGGCGGATCGCATGGCGGTGGTGGACCCGG  
GCGGCCGCGTGATTGGCAGCGAAAACGTGTATGTGGCGGATGCGAGCATTATGCCGCGCCTGCCGACC  
GCGAACACCAACATTCGGGTGATTATGGCGGCGGAAAAAATTAGCGATGCGCTGCTGCGCCATCATTA  
AGGATCC

---

**Table S3.** Summary of the conditions used for purification of the different HMFOs.

| Enzyme            | Cloning vector | Lysis buffer                                               | Chromatographic steps                     | Elution gradient                                         |
|-------------------|----------------|------------------------------------------------------------|-------------------------------------------|----------------------------------------------------------|
| <i>Metsp</i> HMFO | pET23b(+)      | 10 mM EDTA<br>5 mM DTT<br>20 mM Tris/HCl<br>pH 8.0         | ResourceQ (5 mL)<br>MonoQ (1 mL)          | NaCl: 60 – 160 mM (4 CV)<br>NaCl: 0 – 70 mM (10 CV)      |
|                   | pET28a(+)      | 20 mM imidazole<br>300 mM NaCl<br>20 mM Tris/HCl<br>pH 8.0 | HiTrap IMAC FF (5 mL)<br>ResourceQ (5 mL) | Imidazole: 20 – 300 mM (6 CV)<br>NaCl: 0 – 500 mM (5 CV) |
| <i>Psesp</i> HMFO | pET23b(+)      | 10 mM EDTA<br>5 mM DTT<br>20 mM Tris/HCl<br>pH 8.0         | ResourceQ (5 mL)<br>MonoQ (1 mL)          | NaCl: 60 – 160 mM (4 CV)<br>NaCl: 0 – 70 mM (10 CV)      |
| <i>Pseni</i> HMFO | pET28a(+)      | 20 mM imidazole<br>300 mM NaCl<br>20 mM Tris/HCl<br>pH 8.0 | HiTrap IMAC FF (5 mL)<br>ResourceQ (5 mL) | Imidazole: 20 – 300 mM (6 CV)<br>NaCl: 0 – 500 mM (5 CV) |

**Table S4.** Percentages of secondary structure from CD spectra of the different HMFOs.

|                                  | $\alpha$ -helix | $\beta$ -sheet | turn   | unordered |
|----------------------------------|-----------------|----------------|--------|-----------|
| <i>Metsp</i> HMFO                | 37 ± 3          | 17 ± 8         | 20 ± 2 | 26 ± 9    |
| <i>Metsp</i> HMFO <sup>His</sup> | 27 ± 9          | 14 ± 2         | 24 ± 3 | 37 ± 7    |
| <i>Psesp</i> HMFO                | 47 ± 9          | 11 ± 8         | 22 ± 7 | 20 ± 8    |
| <i>Pseni</i> HMFO <sup>His</sup> | 27 ± 6          | 20 ± 3         | 23 ± 3 | 31 ± 4    |

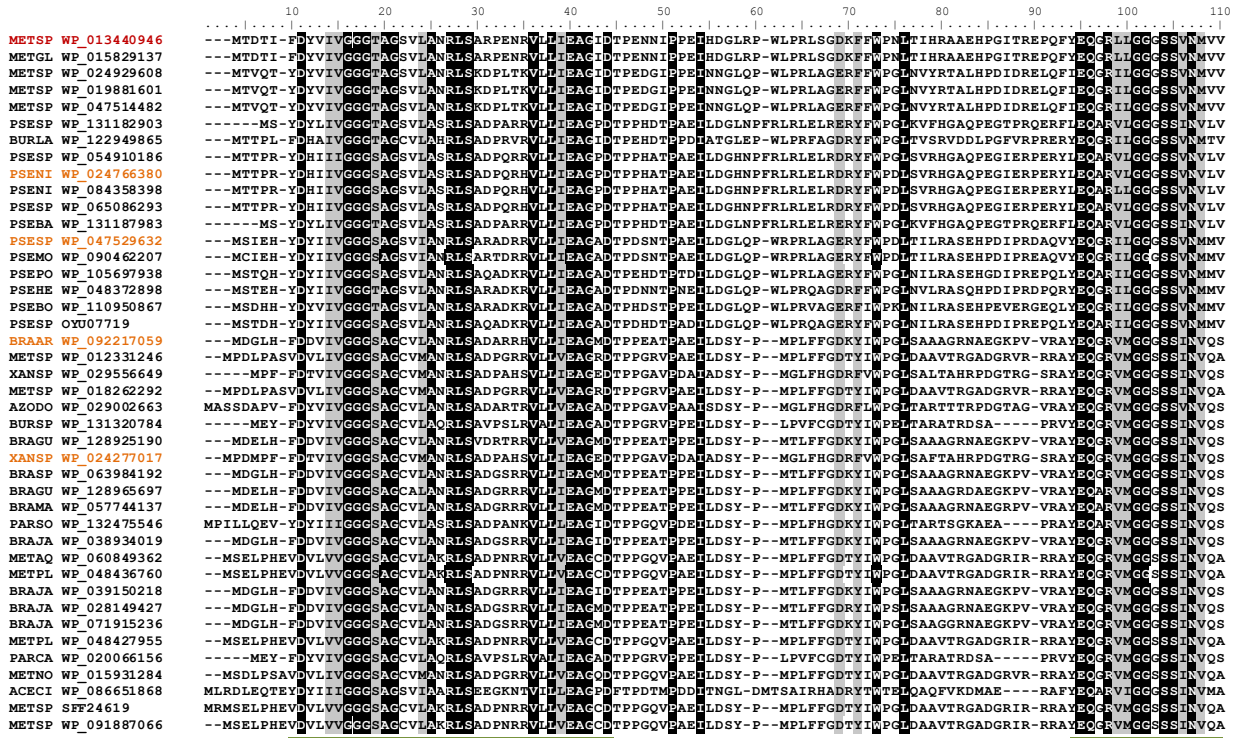

**Fig. S1.** Multiple alignment of 41 HMFO-like sequences from GeneBank screening, together with the *MetspHMFO* sequence (WP\_013440946, red). The *PseniHMFO* (WP\_024766380), *PsepsHMFO* (WP\_047529632), *BraarHMFO* (WP\_092217059) and *XanspHMFO* (WP\_029556649) sequences optimized for *E. coli* production are shown in orange. Residues in black and grey have 100% identity and similarity, respectively. Last line shows: i) conserved motifs in GMC oxidoreductases (ADP-binding domain, PS000623 and PS000624, green); and ii) two catalytic residues (His467 and Asn511) in *MetspHMFO* (red stars).





```

450 460 470 480 490 500 510 520 530 540 550
METSP WF_013440946 LAL-----ALSRFAAPQ-----PGGPL-LNDLLQDEAAERLYLRNVGGVWHSCTARI CRADD SQA VVDKAGRVYGVVGLRVA
METGL WF_015829137 LAL-----ALSRFAAPQ-----PGGPL-LNDLLQDEAAERLYLRNVGGVWHSCTARI CRADD SHA VVDKAGRVYGVVGLRVA
METSP WF_024929608 LSL-----TLSRFAAPQ-----SGGPL-LSELLNDSAAERLYRNVIGGVWHSCTAKI CSEDD PLA VVDPHGKVVYGLSGLRIA
METSP WF_019881601 LSL-----TLSRFAAPQ-----SGGPL-LSELLNDSAAERLYRNVIGGVWHSCTAKI CSEDD PLA VVDPHGKVVYGLSGLRIA
METSP WF_047514482 LSL-----TLSRFAAPQ-----SGGPL-LSELLNDSAAERLYRNVIGGVWHSCTAKI CSEDD PLA VVDPHGKVVYGLSGLRIA
PSESP WF_131182903 LEL-----RLTPFAVPQ-----PGGPA-LSELLADEAAERLYLRQVGGVWHSCTCRI CRADD PLA VVDPAGRVYGVVGLRVA
BURLA WF_122949865 LRP-----VASRFAEPA-----LGGPP-LDALLADDAAEYLRRENVSQVWHSCTCRI CRADD RHA VVDASGRVYGVVGLRVV
PSESP WF_054910186 LQL-----VLTFFAVPQ-----PGGPK-LETLADDDAEYLRRHIGGVWHSCTCRI CRADD PLA VVDASGRVYGVVGLRVA
PSENI WF_024766380 LQL-----ALTPFAVPQ-----PGGPK-LETLADDDAEYLRRHIGGVWHSCTCRI CRADD PLA VVDASGRVYGVVGLRVA
PSENI WF_084358398 LQL-----ALTPFAVPQ-----PGGPK-LETLADDDAEYLRRHIGGVWHSCTCRI CRADD PLA VVDASGRVYGVVGLRVA
PSESP WF_065086293 LQL-----ALTPFAVPQ-----PGGPK-LETLADDDAEYLRRHIGGVWHSCTCRI CRADD PLA VVDASGRVYGVVGLRVA
PSEBA WF_131187983 LEL-----RLTPFAVPQ-----PGGPA-LSELLADEAAERLYLRQVGGVWHSCTCRI CRADD PLA VVDPAGRVYGVVGLRVA
PSESP WF_047529632 LEL-----RLTPFAVPQ-----PGGPA-LSELLADEAAERLYLRQVGGVWHSCTCRI CRADD PLA VVDPAGRVYGVVGLRVA
PSEMO WF_090462207 GPP-----RLSRFAQAS-----TDGPL-LSELLANDVAERLYLRTHVGGVWHSCTCRI CRADD PLA VVDHAGRVYGVVGLRVA
FSEPO WF_105697938 GPP-----RLSRFAQAS-----TDGPL-LSELLANDVAERLYLRTHVGGVWHSCTCRI CRADD PLA VVDHAGRVYGVVGLRVA
FSEHE WF_048372898 GPP-----RLSRFAQAS-----TDGPL-LSELLANDVAERLYLRTHVGGVWHSCTCRI CRADD PLA VVDHAGRVYGVVGLRVA
FSEBO WF_110950867 GPP-----RLSRFAQAS-----TDGPL-LSELLANDVAERLYLRTHVGGVWHSCTCRI CRADD PLA VVDHAGRVYGVVGLRVA
PSESP OYU07719 GPP-----RLSRFAQAS-----TDGPL-LSELLANDVAERLYLRTHVGGVWHSCTCRI CRADD PLA VVDHAGRVYGVVGLRVA
BRAAR WF_092217059 GDFPPASYSPIKRLSRVGTANRIVASILGPMLDVPAQLRQLLIRLVLNGTA-FQATLADRAAEAFVRSSTFGVWHSCTCRM CDPA RMA VVDPRGRVYGVVGLRVA
METSP WF_012331246 AALVPAASFPAIKRLSRVSPGNRRVTALLAALLDGPAFLRRLMLRAV-SGGVA-LGEVVGDDAAERDVRDLVFGVWHSCTCRM CDPC FGA VVDPAAGVYGVVGLRVA
XANSP WF_029556649 GDVFPAAFSPPVKRLSRVSRTRNALLAEALGTLLDPAALRQLALRFMSGGIS-LAEIVADEARAEAFVRSSTFGVWHSCTCRM CDPC FGA VVDPAAGVYGVVGLRVA
METSP WF_018262292 AALVPAASFPAIKRLSRVSPGNRRVTALLAALLDGPAFLRRLMLRAV-SGGVA-LGEVVGDDAAERDVRDLVFGVWHSCTCRM CDPC FGA VVDPAAGVYGVVGLRVA
AZODO WF_029002663 ADLFPAGFTPAIKRLSAVSPGNAALTAVLGALLDPAALRGVLLRFRFMSGG-A-IGAILADDAAEAFVRSSTFGVWHSCTCRM CDAD PEV VVDPTGRVYGVVGLRVA
BURSP WF_131320784 RDLFPAAFSARVKALSRVSGAGNALLTSLGVLDDGPAFLRRLMLRERFTRGRQ-LGDLADQAAEDFIRANAFVGGVWHSCTCRM CDAS PAV VVDTAGVYGVVGLRVA
BRAGU WF_128925190 GDFPPASYSPIKRLSRVGTANRIVASILGPMLDVPAQLRQLLIRLVLNGTA-FQATLADRAAEAFVRSSTFGVWHSCTCRM CDPA RMA VVDPRGRVYGVVGLRVA
XANSP WF_024277017 GDVFPAAFSPPVKRLSRVSRTRNALLAEALGALLDPAALRQLALRFMSGGIS-LAEIVADEARAEAFVRSSTFGVWHSCTCRM CDPC FGA VVDPAAGVYGVVGLRVA
BRASP WF_063984192 ADLFPAGFTPAIKRLSRVGTANRIVASILGPMLDVPAQLRQLLIRLVLNGTA-FQATLADRAAEAFVRSSTFGVWHSCTCRM CDAD PEV VVDPTGRVYGVVGLRVA
BRAGU WF_128965697 GDFPPASYSPIKRLSRVGTANRIVASILGPMLDVPAQLRQLLIRLVLNGTA-FQATLADRAAEAFVRSSTFGVWHSCTCRM CDPA RMA VVDPRGRVYGVVGLRVA
BRAMA WF_057744137 GDVFPASYSPIKRLSRVGTANRIVASILRPMLDVPAQLRQLLIRLVLNGTA-FRATLADRAAEAFVRSSTFGVWHSCTCRM CDPA RMA VVDPRGRVYGVVGLRVA
PARSO WF_132475546 RDLFPASFSPIKRLSRVSRTRNALLAEALGALLDPAALRQLALRFMSGGIS-LAEIVADEARAEAFVRSSTFGVWHSCTCRM CDPC FGA VVDPAAGVYGVVGLRVA
BRAJA WF_038934019 GDFPPASYSPIKRLSRVGTANRIVASILGPMLDVPAQLRQLLIRLVLNGTA-FQATLADRAAEAFVRSSTFGVWHSCTCRM CDPA RMA VVDPRGRVYGVVGLRVA
METAQ WF_060849362 AALVPAASFPAIKRLSRVSPGNRRVTALLAALLDGPAFLRRLMLRAV-SGGVD-LGRIADDAAEAFVRSSTFGVWHSCTCRM CDST RGA VVDPTGRVYGVVGLRVA
METPL WF_048436760 AALVPAASFPAIKRLSRVSPGNRRVTALLAALLDGPAFLRRLMLRAV-SGGVD-LGRIADDAAEAFVRSSTFGVWHSCTCRM CDST RGA VVDPTGRVYGVVGLRVA
BRAJA WF_039150218 DDFPPASFSPIKRLSRVGTANRIVASILGPMLDVPAQLRQLLIRLVLNGTA-FQATLADRAAEAFVRSSTFGVWHSCTCRM CDPA RMA VVDPRGRVYGVVGLRVA
BRAJA WF_028149427 GDFPPASYSPIKRLSRVGTANRIVASILGPMLDVPAQLRQLLIRLVLNGTA-FQATLADRAAEAFVRSSTFGVWHSCTCRM CDPA RMA VVDPRGRVYGVVGLRVA
BRAJA WF_071915236 GDFPPASYSPIKRLSRVGTANRIVASILGPMLDVPAQLRQLLIRLVLNGTA-FQATLADRAAEAFVRSSTFGVWHSCTCRM CDPA RMA VVDPRGRVYGVVGLRVA
METPL WF_048427955 AALVPAASFPAIKRLSRVSPGNRRVTALLAALLDGPAFLRRLMLRAV-SGGVD-LGRIADDAAEAFVRSSTFGVWHSCTCRM CDST RGA VVDPTGRVYGVVGLRVA
PARCA WF_020066156 RDLFPAAFSARVKALSRVSGAGNALLTSLGVLDDGPAFLRRLMLRERFTRGRQ-LGDLADQAAEDFIRANAFVGGVWHSCTCRM CDAS PAV VVDTAGVYGVVGLRVA
METNO WF_015931284 AALVPAASFPAIKRLSRVSPGNRRVTALLAALLDGPAFLRRLMLRAV-SGGVA-LGEVVGDDAAERDVRDLVFGVWHSCTCRM CDPC FGA VVDPAAGVYGVVGLRVA
ACECI WF_086651868 YVP-----HVHFGRL-RLGAAG-----TGAVLPRDLVAEERNDYFRSAVKVWHSCTARI CRHDD PLA VVDNSARLVYGVVGLRVA
METSP SFF24619 AALVPAASFPAIKRLSRVSPGNRRVTALLAALLDGPAFLRRLMLRAV-SGGVD-LGRIADDAAEAFVRSSTFGVWHSCTCRM CDST RGA VVDPTGRVYGVVGLRVA
METSP WF_091887066 AALVPAASFPAIKRLSRVSPGNRRVTALLAALLDGPAFLRRLMLRAV-SGGVD-LGRIADDAAEAFVRSSTFGVWHSCTCRM CDST RGA VVDPTGRVYGVVGLRVA
560 570 580 590 600
METSP WF_013440946 DASIMPRVSTANTNDFVIMLAEKIADAILTQA-----
METGL WF_015829137 DASIMPRVSTANTNDFVIMLAEKIADAILLAQA-----
METSP WF_024929608 DASIMPRVSTANTNDFVIMVAEKIADISLISGN-----
METSP WF_019881601 DASIMPRVSTANTNDFVIMVAEKIADISLISGN-----
METSP WF_047514482 DASIMPRVSTANTNDFVIMVAEKIADISLISGN-----
PSESP WF_131182903 DASIMPRVSTANTNDFVIMLAEKIADAILLAGA-----
BURLA WF_122949865 DASIMPRVSTANTNDFVIMLAEKIADAILKQAR-----
PSESP WF_054910186 DASIMPRVSTANTNDFVIMLAEKIADAILGGA-----
PSENI WF_024766380 DASIMPRVSTANTNDFVIMLAEKIADAILGGA-----
PSENI WF_084358398 DASIMPRVSTANTNDFVIMLAEKIADAILGGA-----
PSESP WF_065086293 DASIMPRVSTANTNDFVIMLAEKIADAILGGA-----
PSEBA WF_131187983 DASIMPRVSTANTNDFVIMLAEKIADAILLAGA-----
PSESP WF_047529632 DASIMPRVSTANTNDFVIMIAEKIADAILLADA-----
PSEMO WF_090462207 DASIMPRVSTANTNDFVIMIAEKIADAILLADA-----
FSEPO WF_105697938 DASIMPRVSTANTNDFVIMIAEKIADAILLANA-----
FSEHE WF_048372898 DASIMPRVSTANTNDFVIMIAEKIADAILLANA-----
FSEBO WF_110950867 DASIMPRVSTANTNDFVIMIAEKIADAILLANA-----
PSESP OYU07719 DASIMPRVSTANTNDFVIMIAEKIADAILLANA-----
BRAAR WF_092217059 DASIMPRVSTANTNDFVIMIAEKIADAILRHH-----
METSP WF_012331246 DASIMPRVSTANTNDFVIMVAEKIADHLAGRPPPPA-----
XANSP WF_029556649 DASIMPRVSTANTNDFVIMIAEKIADHLAGRPPPPA-----
METSP WF_018262292 DASIMPRVSTANTNDFVIMIAEKIADHLAGRPPPPA-----
AZODO WF_029002663 DASIMPRVSTANTNDFVIMIAEKIADHLAGRPPPPA-----
BURSP WF_131320784 DASIMPRVSTANTNDFVIMIAEKIADHLAGRPPPPA-----
BRAGU WF_128925190 DASIMPRVSTANTNDFVIMIAEKIADHLAGRPPPPA-----
XANSP WF_024277017 DASIMPRVSTANTNDFVIMIAEKIADHLAGRPPPPA-----
BRASP WF_063984192 DASIMPRVSTANTNDFVIMIAEKIADHLAGRPPPPA-----
BRAGU WF_128965697 DASIMPRVSTANTNDFVIMIAEKIADHLAGRPPPPA-----
BRAMA WF_057744137 DASIMPRVSTANTNDFVIMIAEKIADHLAGRPPPPA-----
PARSO WF_132475546 DASIMPRVSTANTNDFVIMIAEKIADHLAGRPPPPA-----
BRAJA WF_038934019 DASIMPRVSTANTNDFVIMIAEKIADHLAGRPPPPA-----
METAQ WF_060849362 DASIMPRVSTANTNDFVIMIAEKIADHLAGRPPPPA-----
METPL WF_048436760 DASIMPRVSTANTNDFVIMIAEKIADHLAGRPPPPA-----
BRAJA WF_039150218 DASIMPRVSTANTNDFVIMIAEKIADHLAGRPPPPA-----
BRAJA WF_028149427 DASIMPRVSTANTNDFVIMIAEKIADHLAGRPPPPA-----
BRAJA WF_071915236 DASIMPRVSTANTNDFVIMIAEKIADHLAGRPPPPA-----
METPL WF_048427955 DASIMPRVSTANTNDFVIMIAEKIADHLAGRPPPPA-----
PARCA WF_020066156 DASIMPRVSTANTNDFVIMIAEKIADHLAGRPPPPA-----
METNO WF_015931284 DASIMPRVSTANTNDFVIMIAEKIADHLAGRPPPPA-----
ACECI WF_086651868 DASIMPRVSTANTNDFVIMIAEKIADHLAGRPPPPA-----
METSP SFF24619 DASIMPRVSTANTNDFVIMIAEKIADHLAGRPPPPA-----
METSP WF_091887066 DASIMPRVSTANTNDFVIMIAEKIADHLAGRPPPPA-----

```

Fig. S1. (cont.)

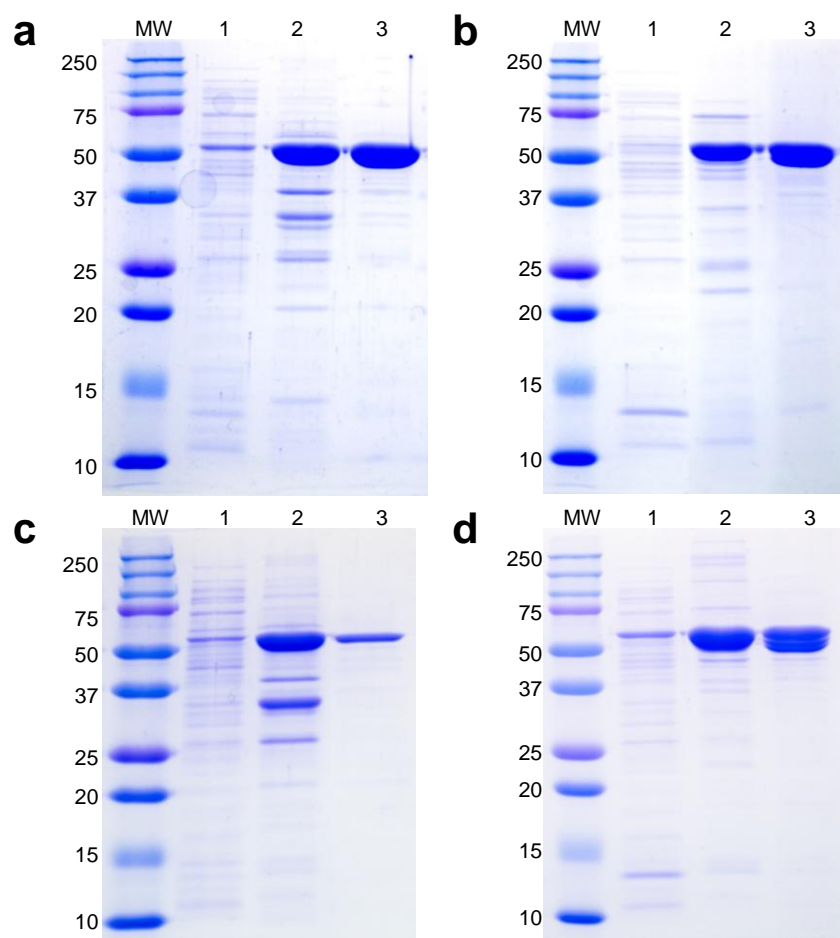

**Fig. S2.** SDS-PAGE during purification of *MetspHMFO* (**a**), *MetspHMFO*<sup>His</sup> (**b**), *PsespHMFO* (**c**) and *PseniHMFO*<sup>His</sup> (**d**). Lane 1 corresponds to the initial cell lysates. Lanes 2 and 3 correspond to the protein fractions after ResourceQ and MonoQ chromatography in **a** and **c**, and after HiTrapIMAC and ResourceQ chromatography steps in **b** and **d**, according to **Table S3**.

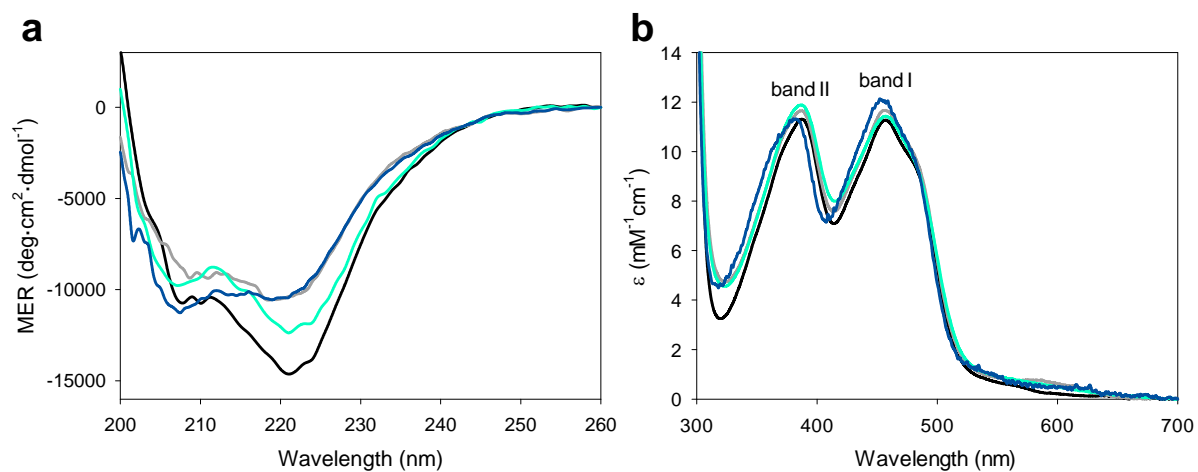

**Fig. S3.** Spectroscopic analyses of the different HMFOs: Far-UV CD spectra (a) and UV-visible spectra (b) of *Metsp*HMFO (black), *Metsp*HMFO<sup>His</sup> (gray), *Psesp*HMFO (cyan) and *Pseni*HMFO<sup>His</sup> (blue).

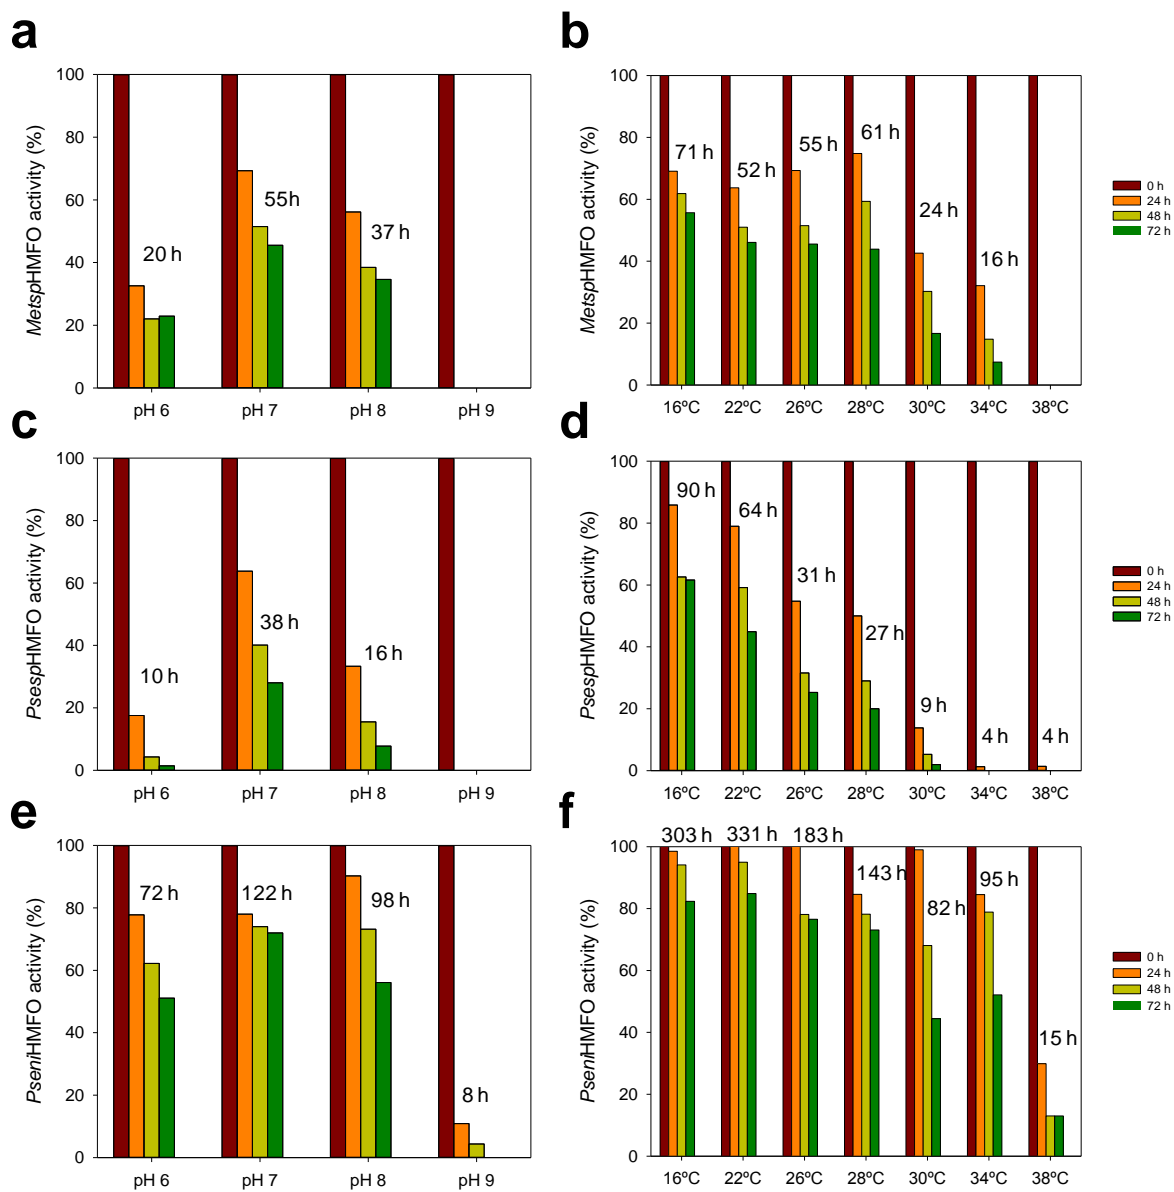

**Fig. S4.** Residual activity of *Metsp*HMFO (**a** and **b**), *Psesp*HMFO (**c** and **d**) and *Pseni*HMFO (**e** and **f**) during 72-h oxidation of HMF under different pH (**a**, **c** and **e**) and temperature (**b**, **d**, and **f**) conditions. Enzyme half-lives ( $t_{1/2}$ ) for each condition are indicated on the bars. Activity was measured with vanillyl alcohol in 50 mM Tris/HCl, pH 7.0.

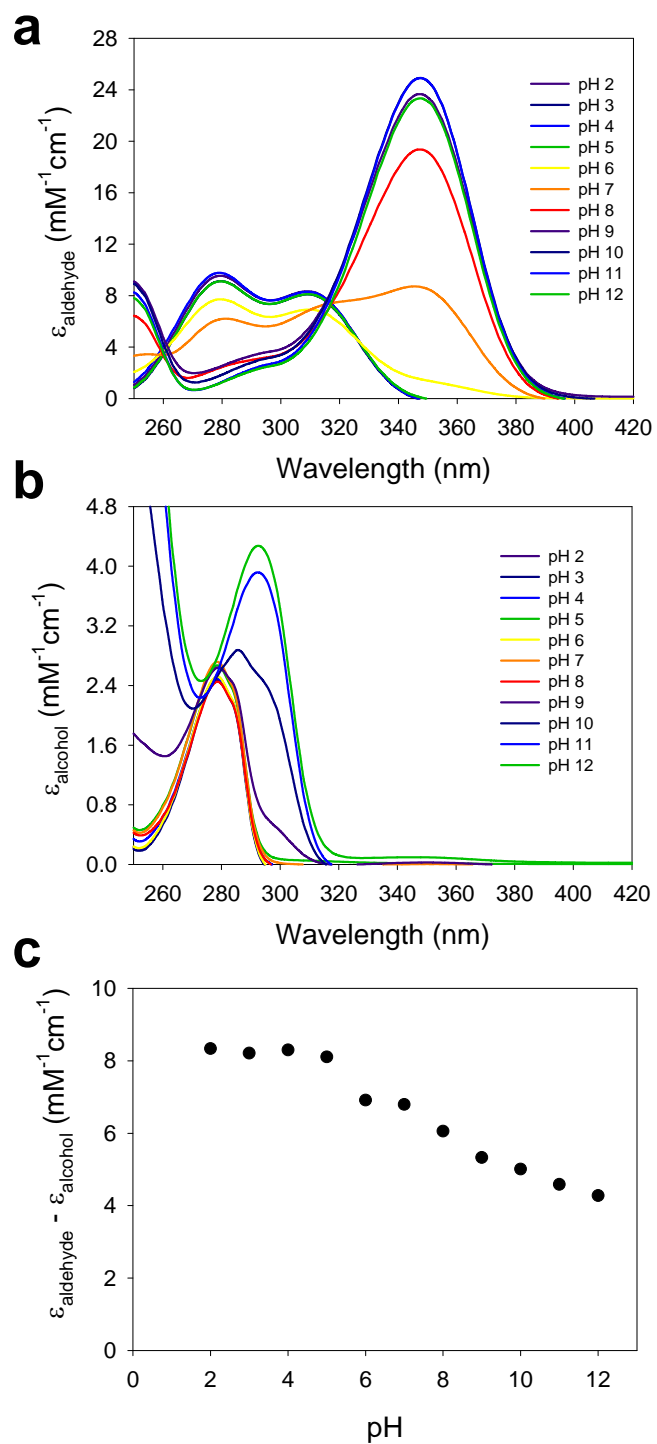

**Fig. S5.** Effect of pH (2-12 range) on the UV-vis spectra of vanillin (a) and vanillyl alcohol (b) in 0.1 M B&R buffer, and changes with pH in the difference extinction-coefficient at 309 nm ( $\epsilon_{\text{aldehyde}} - \epsilon_{\text{alcohol}}$ ) used for estimating the vanillyl alcohol transformation into vanillin (c).
